# Supplementary material for: Visible light sensitized near-infrared luminescence of ytterbium via ILCT states in quadruple-stranded helicates
Source: Royal Society of Chemistry journal article supplement (doi:10.1039/c9dt00614a), 2019-01-01
Supplement: c9dt00614a1.pdf [file c9dt00614a1.pdf]

## Supplementary Information

### Visible light sensitized near-infrared luminescence of ytterbium via ILCT states in quadruple-stranded helicates

Zihan Zhang, Yanyan Zhou, Hongfeng Li,\* Ting Gao and Pengfei Yan\*

Key Laboratory of Functional Inorganic Material Chemistry, Ministry of Education, P. R. China;  
School of Chemistry and Materials Science, Heilongjiang University, Harbin 150080, P. R. China.

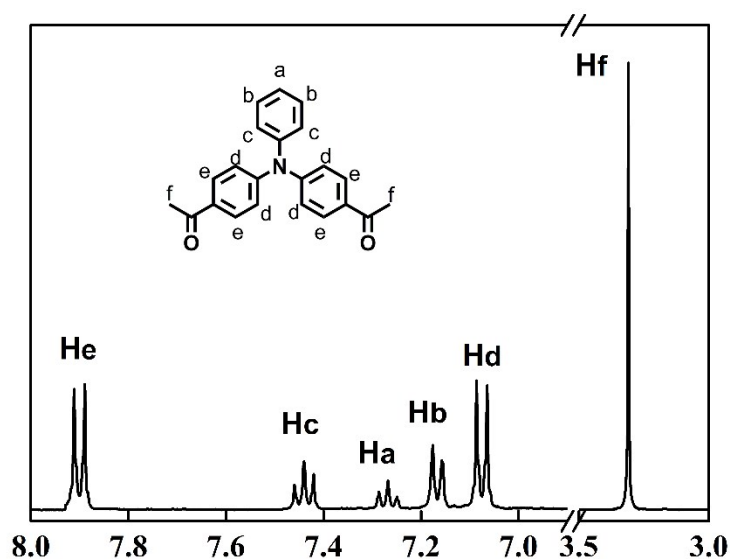

Figure S1. <sup>1</sup>H NMR spectrum of 4,4'-diacetyl triphenylamine in DMSO-*d*<sub>6</sub>.

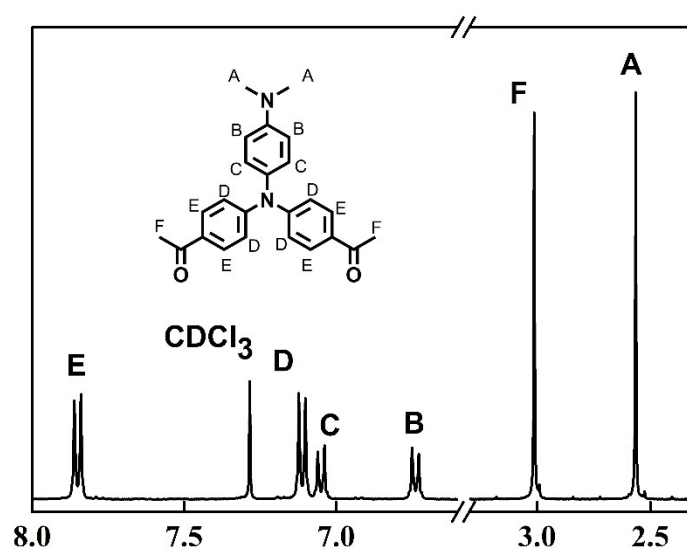

Figure S2. <sup>1</sup>H NMR spectrum of 4-(N,N-Dimethylamino)-4',4''-diacetyltriphenylamine in CDCl<sub>3</sub>.

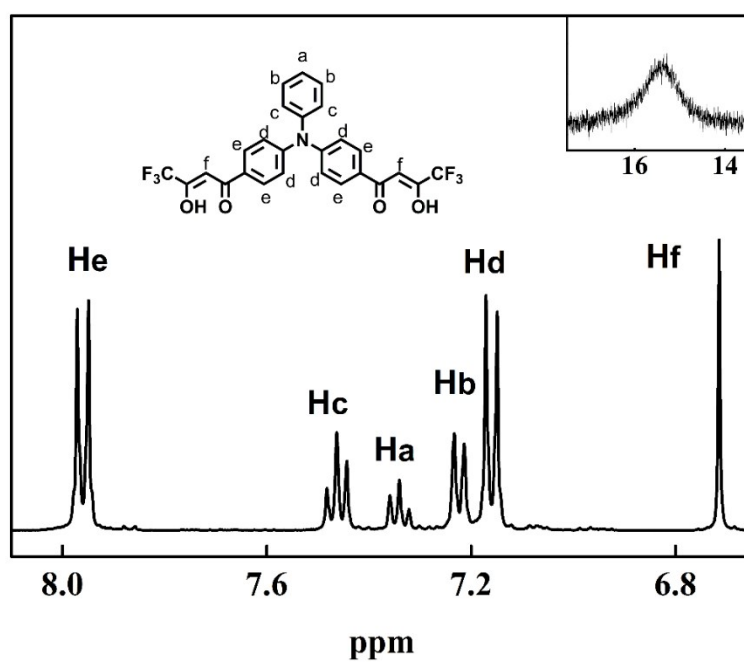

Figure S3. <sup>1</sup>H NMR spectrum of **L<sup>1</sup>** in DMSO-*d*<sub>6</sub>.

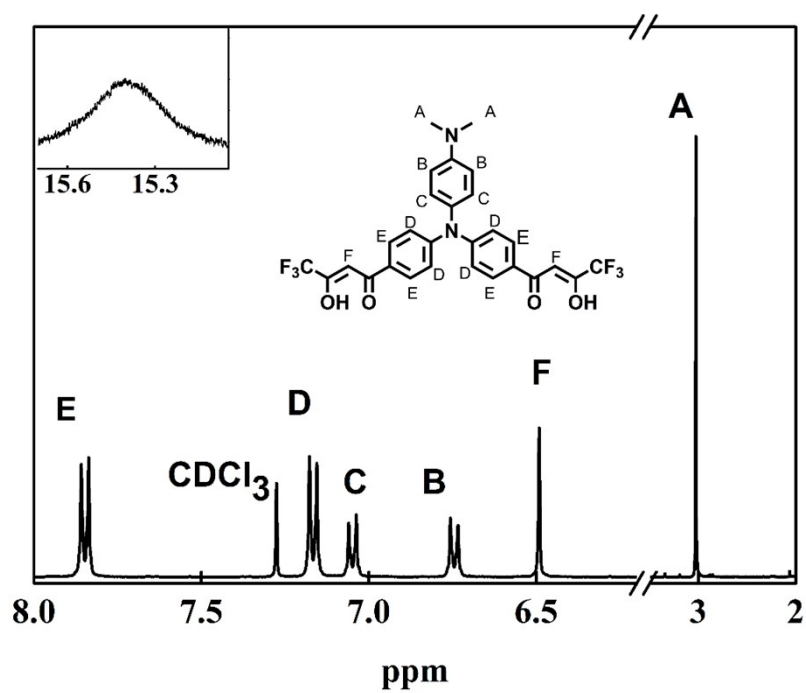

Figure S4. <sup>1</sup>H NMR spectrum of **L<sup>2</sup>** in CDCl<sub>3</sub>.

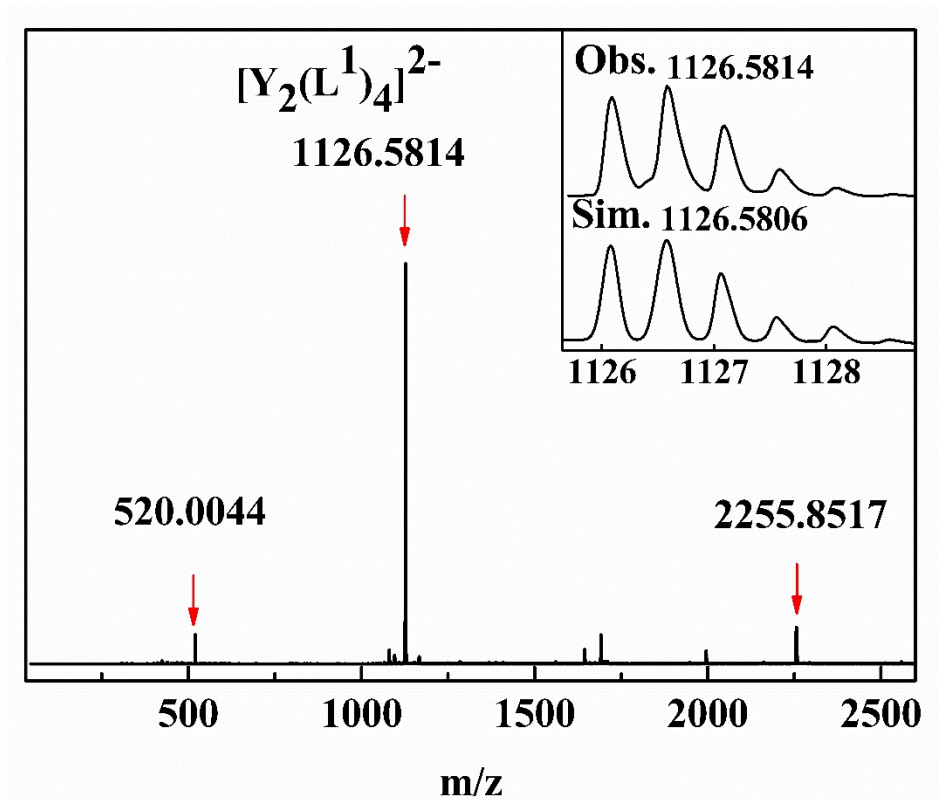

Figure S5. ESI-TOF-MS of  $[Y_2(L^1)_4]$ .

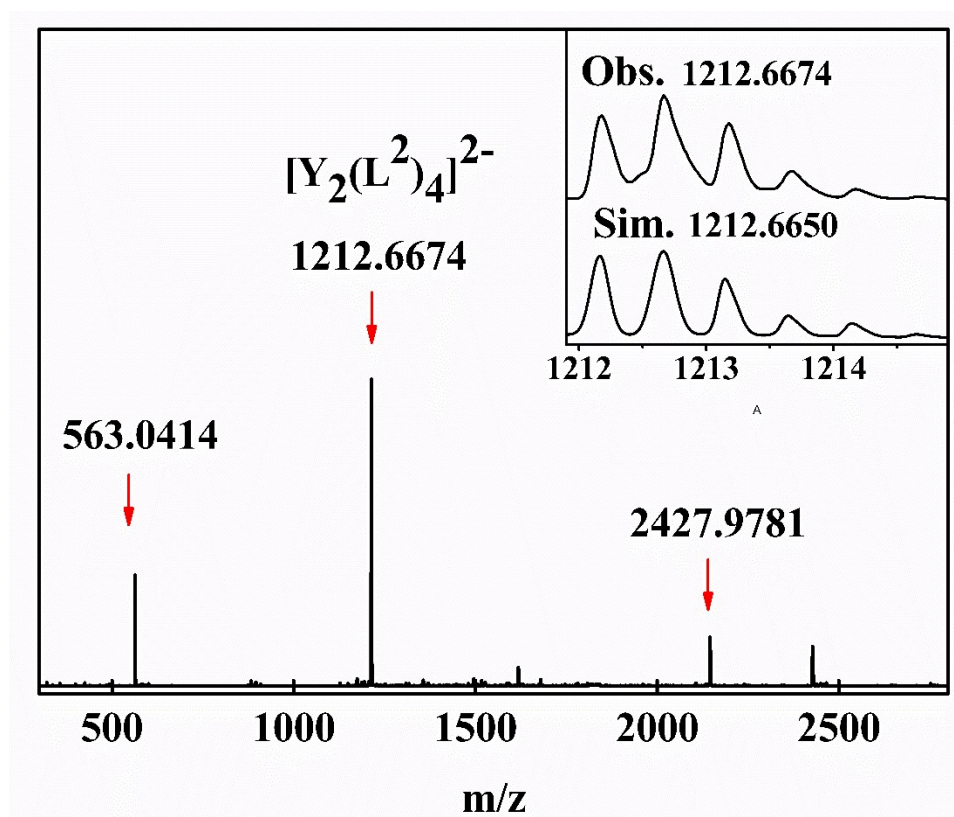

Figure S6. ESI-TOF-MS of  $[Y_2(L^2)_4]$ .

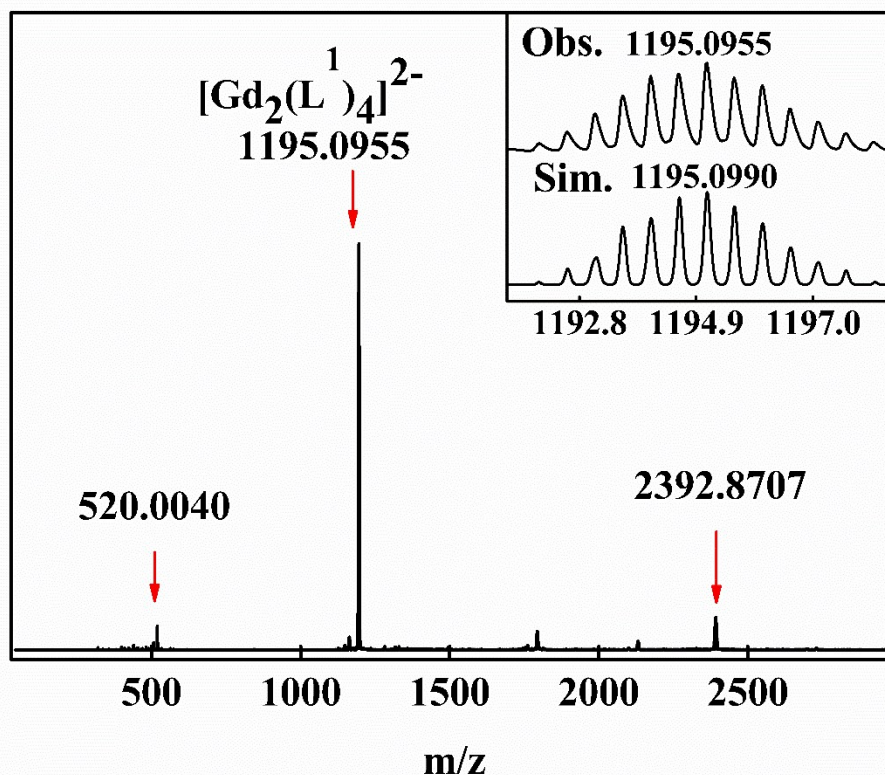

Figure S7. ESI-TOF-MS of  $[\text{Gd}_2(\text{L}^1)_4]$ .

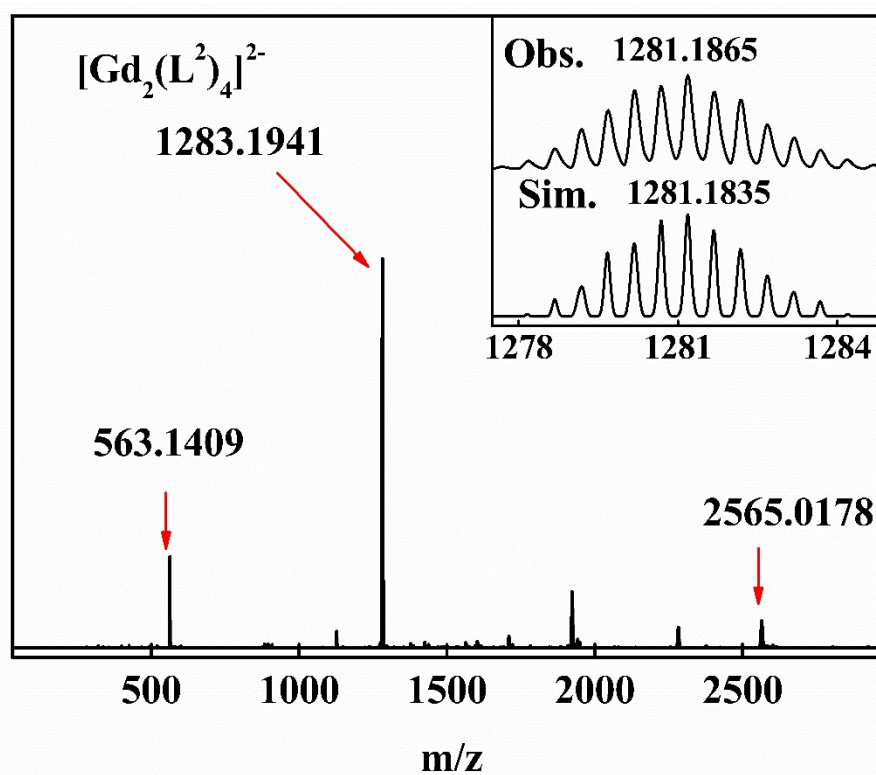

Figure S8. ESI-TOF-MS of  $[\text{Gd}_2(\text{L}^2)_4]$ .



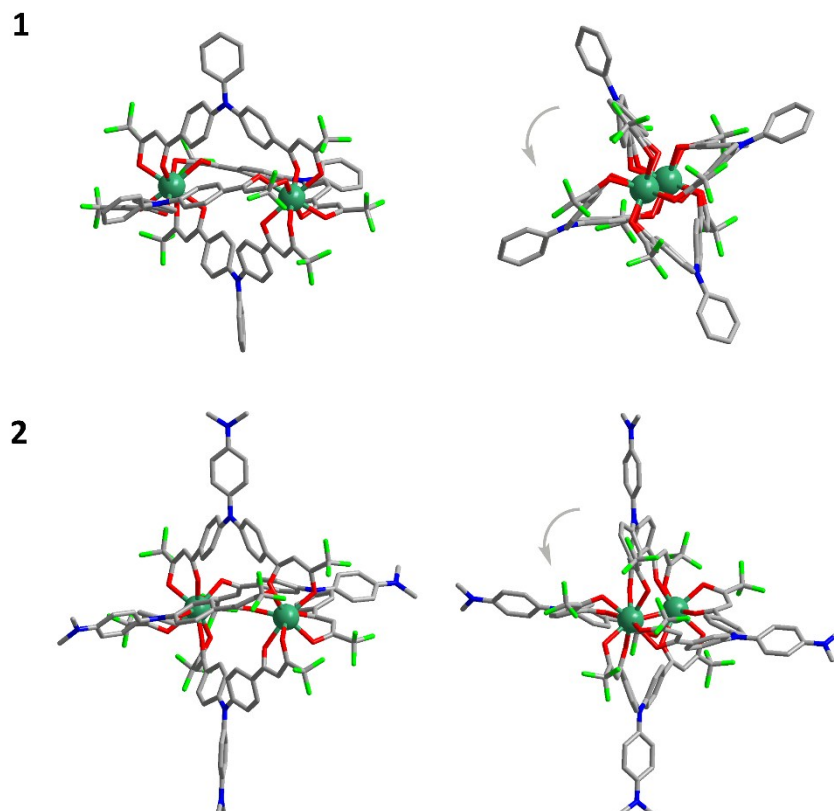

**Figure S9.** Side view (left) and top view (right) of the structures of complexes **1** and **2** optimized by Sparkle/PM6 model (For clearance, only right-handed  $\Delta$ - $\Delta$  helix are presented).

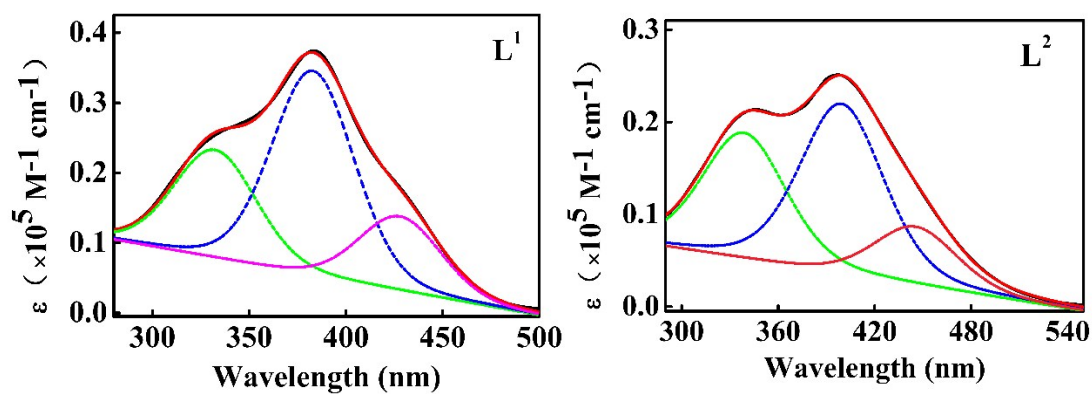

**Figure S10.** Experimental UV/Vis absorption spectra (solid black line), respective Gaussian deconvolutions (dashed lines), and best fit (solid red line):  $R=0.9995$  (for **L**<sup>1</sup>), and  $R=0.9999$  (for **L**<sup>2</sup>).

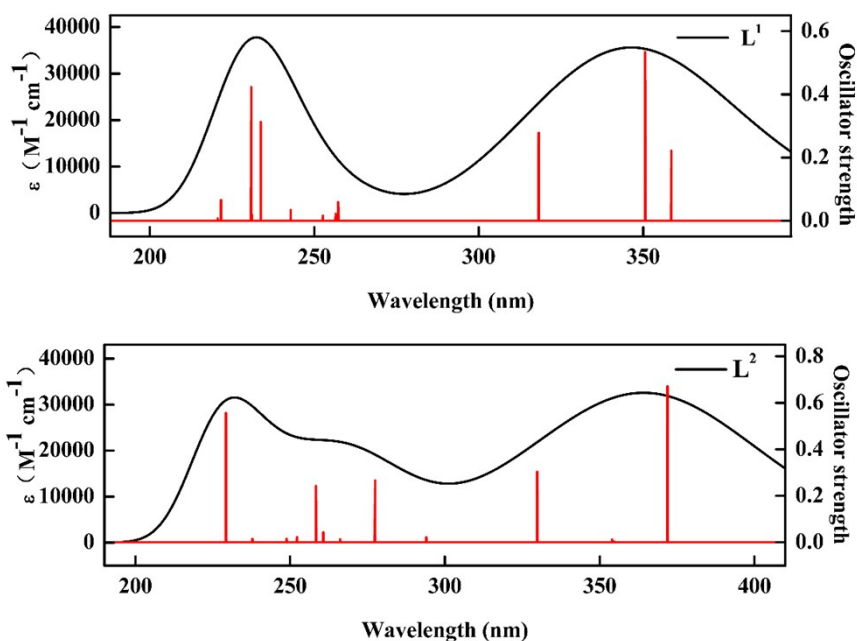

**Figure S11.** Theoretical UV-Visible absorption spectra of  $L^1$  (up) and  $L^2$  (down) and selected most pertinent lowlying electronic transitions and assignment of  $L^1$ ,  $L^2$ .

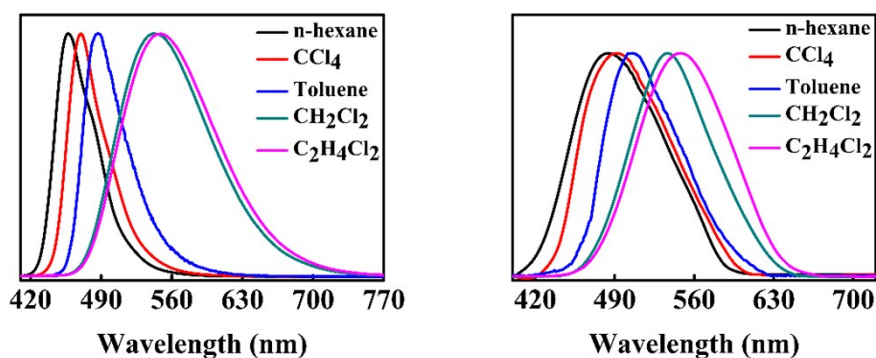

**Figure S12.** Normalized emission spectra of  $L^1$  and  $L^2$  in various solvents.

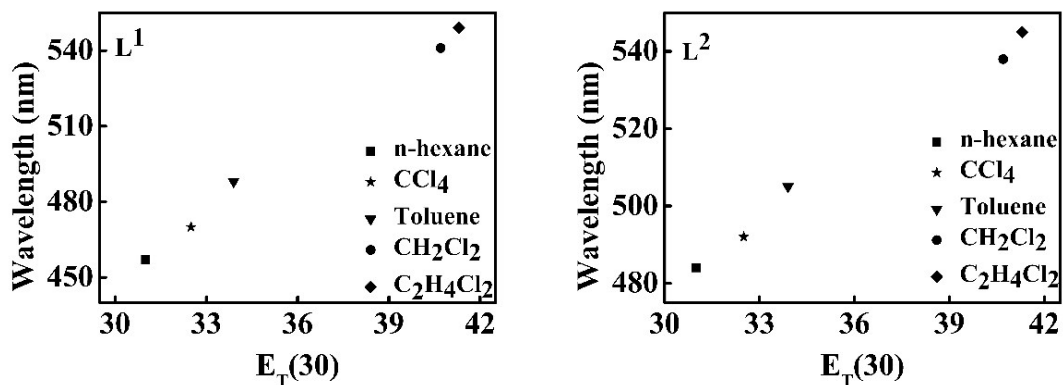

**Figure S13.** Variation of the emission wavelength maximum for  $L^1$  and  $L^2$  as a function of Reichardt's empirical solvent polarity parameters  $E_T(30)$ .

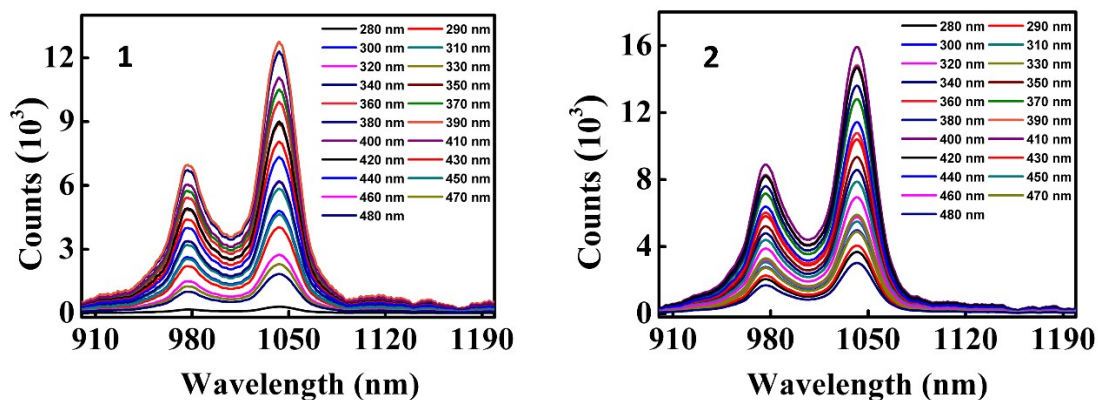

**Figure S14.** Wavelength dependent emission spectra of complexes **1** and **2**.

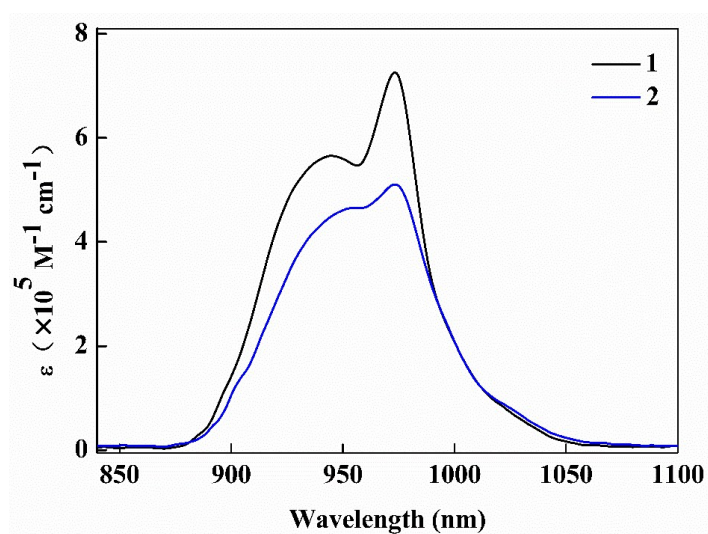

**Figure S15.** Near-infrared spectra of f-f absorption transition for **1** and **2** in CH<sub>3</sub>CN.

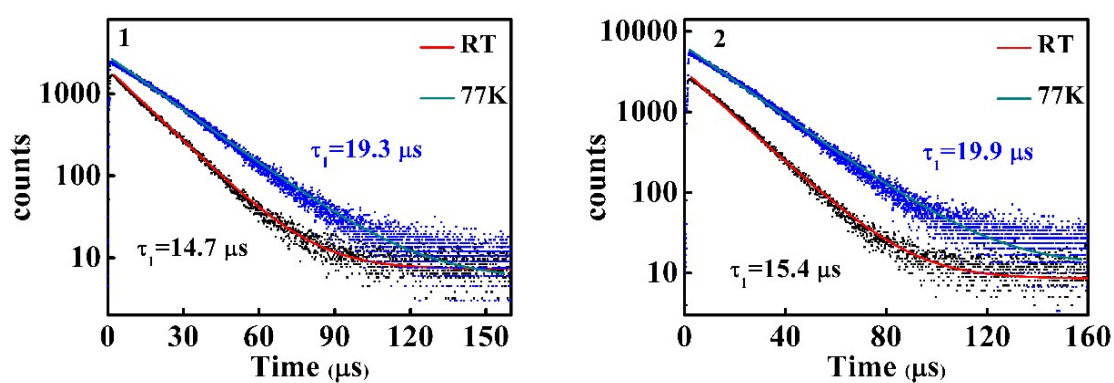

**Figure S16.** Luminescence decay curves of **1** and **2** in CH<sub>3</sub>CN monitored at 1042 nm.

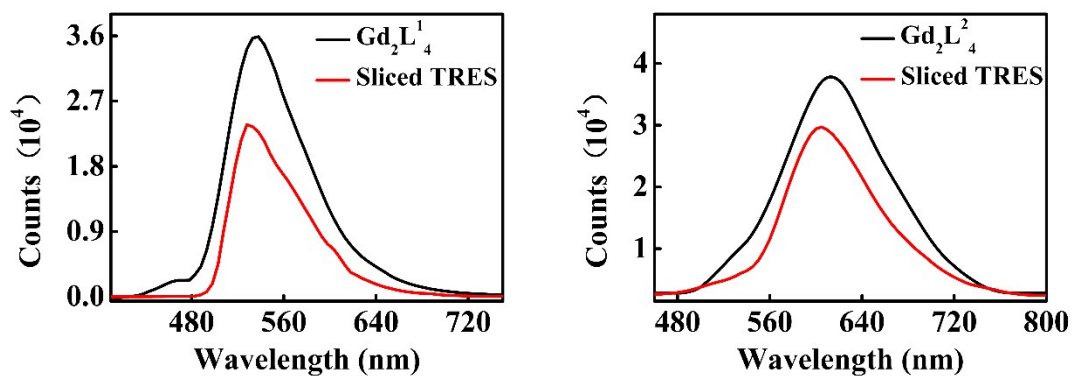

**Figure S17.** Emission spectra of  $\text{Gd}_2\text{L}_4$  (black) at 77 K and time delay (100  $\mu\text{s}$ ) in  $\text{CH}_3\text{CN}$ .

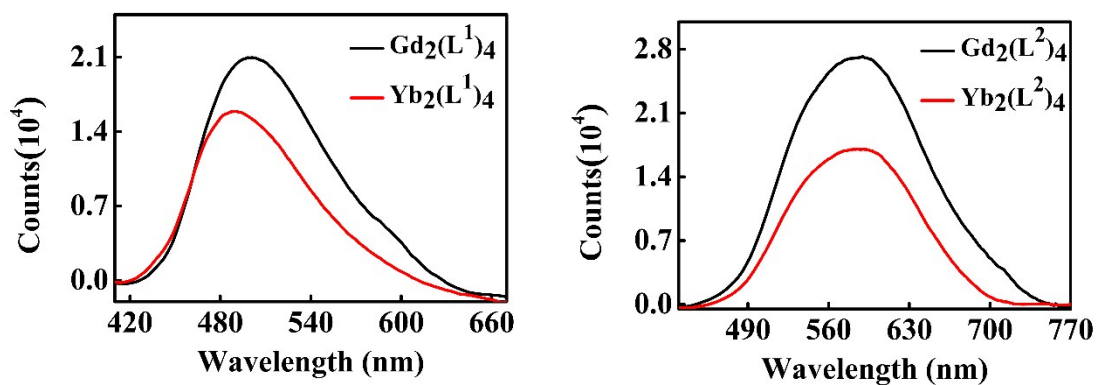

**Figure S18.** Emission spectra of  $\text{Gd}_2\text{L}_4$  (black) and  $\text{Yb}_2\text{L}_4$  (red) in  $\text{CH}_3\text{CN}$  at room temperature.
